# Supplementary material for: Diverse RNA Viruses Associated with Diatom, Eustigmatophyte, Dinoflagellate, and Rhodophyte Microalgae Cultures
Source: PubMed Central journal article supplement (PMC9599419; doi:10.1128/jvi.00783-22), 2022-10-03
Supplement: jvi.00783-22-s0001.pdf [file jvi.00783-22-s0001.pdf]

## Appendices

### Supplementary Tables

**Table A1. Genome BLASTn analysis of the viruses detected in this study.** Host algal species in which the closest species are used as surrogates are indicated with a \* symbol.

| Viral Species                 | Algae Culture/Library  | Algae Species          | Genome                                              | Blast   |
|-------------------------------|------------------------|------------------------|-----------------------------------------------------|---------|
| Triopas Ghabri-like Virus 1   | <i>P. cf. balticum</i> | <i>P. cf. balticum</i> | GCA_001652855.1                                     | No hits |
| Taphios Ghabri-like Virus 1   | <i>N. oceanica</i>     | <i>N. oceanica</i>     | GCA_004519485.1                                     | No hits |
| Taphios Ghabri-like Virus 1   | <i>T. weissflogii</i>  | <i>T. oceanica*</i>    | GCA_019693575.1                                     | No hits |
| Diktys Durna-like Virus 1     | <i>P. lima</i>         | <i>P. minimum*</i>     | GCA_001652855.1                                     | No hits |
| Orion Durna-like Virus 1      | <i>G. carpenteri</i>   | <i>G. carpenteri</i>   | Not available                                       | ND      |
| Almopos Endorna-like Virus 1  | <i>G. carpenteri</i>   | <i>G. carpenteri</i>   | Not available                                       | ND      |
| Althepos Endorna-like Virus 1 | <i>G. carpenteri</i>   | <i>G. carpenteri</i>   | Not available                                       | ND      |
| Phineus Pisuviri-like Virus 1 | <i>R. maculata</i>     | <i>R. maculata</i>     | Not available                                       | ND      |
| Megareus Marna-like Virus 1   | <i>N. oculata</i>      | <i>N. oculata</i>      | GCA_004335455.1                                     | No hits |
| Minyas Marna-like Virus 1     | <i>N. oculata</i>      | <i>N. oculata</i>      | GCA_004335455.1                                     | No hits |
| Pisuviri-like Signal          | <i>E. gracilis</i>     | <i>E. gracilis</i>     | GCA_900893395.1<br>GCA_001638955<br>(mitochondrial) | +++     |

**Table A2. Number of SRA accessions screened for the newly identified viruses and their corresponding hits.** “SRA nb”: number of SRA libraries used for each algae species; “Hits found”: SRA library accessions for virus positive hits.

| <b>Viral species</b>          | <b>Library</b>         | <b>Algae clade</b> | <b>SRA nb</b> | <b>Hits found</b> |
|-------------------------------|------------------------|--------------------|---------------|-------------------|
| Taphios ghabri-like virus 1   | <i>N. oceanica</i>     | Nannochloropsis    | 292           | None              |
| Taphios ghabri-like virus 1   | <i>T. weissflogii</i>  | Thalassiosira      | 709           | SRR12347810       |
| Triopas ghabri-like virus 1.1 | <i>P. cf. balticum</i> | Prorocentrum       | 143           | None              |
| Diktys durna-like virus 1     | <i>P. lima</i>         | Prorocentrum       | 143           | None              |
| Orion durna-like virus 1      | <i>G. carpenteri</i>   | Gambierdiscus      | 86            | SRR3358210        |
| Pisuviri-like signal          | <i>E. gracilis</i>     | Euglena            | 72            | SRR2294740        |
| Almopos endorna-like virus 1  | <i>G. carpenteri</i>   | Gambierdiscus      | 86            | None              |
| Althepos endorna-like virus 1 | <i>G. carpenteri</i>   | Gambierdiscus      | 86            | None              |
| Phineus pisuviri-like virus 1 | <i>R. maculata</i>     | Rhodella           | 3             | None              |
| Megareus marna-like virus 1   | <i>N. oculata</i>      | Nannochloropsis    | 292           | None              |
| Minyas marna-like virus 1     | <i>N. oculata</i>      | Nannochloropsis    | 292           | None              |

**Table A3. List of primer sequences used in this study.** All PCR reactions were performed at a universal annealing temperature of 60°C. ITS: Internal Transcribed Spacer. LSU: Ribosomal Large Subunit.

| Primer ID                     | Direction | Sequence (5'-3')     | Sequence targeted             | length |
|-------------------------------|-----------|----------------------|-------------------------------|--------|
| Euglena-ITS Fw                | Forward   | TCCTGCCTATCACCCACA   | E. gracilis ITS               | 273    |
| Euglena-ITS Rev               | Reverse   | CTACCCCGGTCCCAGCTTT  |                               |        |
| Pisuviri-like signal Fw       | Forward   | TGCTGCACCTGCTATGCTT  | Pisuviri-like signal          | 500    |
| Pisuviri-like signal Rev      | Reverse   | CACGTGTGTCATCCCCACA  |                               |        |
| P.minimum ITS Fw              | Forward   | CAGTTGGTGAGGCTCTGGG  | P. cf. balticum ITS           | 214    |
| P.minimum ITS Rev             | Reverse   | TCGTTGTTTCGAGCCGAGAC |                               |        |
| Triopas ghabri-like virus 1   | Forward   | GCGARATGRTKGTSGARYT  | Triopas ghabri-like virus 1   | 400    |
| Triopas ghabri-like virus 1   | Reverse   | RTGSCCRATGWRCTGSACG  |                               |        |
| ITS1-Fw                       | Forward   | TCCGTAGGTGAACCTGCGG  | T. weissflogii ITS            | 322    |
| Glaucozystis ITS Rev          | Reverse   | TCGCTGCGTTCTTCATCGT  |                               |        |
| Taphios ghabri-like virus 1   | Forward   | ACACGGAAAGGTGAGAGCG  | Taphios ghabri-like virus 1   | 822    |
| Taphios ghabri-like virus 1   | Reverse   | GGGCCAGCATAGCTAGCTC  |                               |        |
| N. oculata ITS                | Forward   | GTGGCCGATTATGGGAGGG  | N. oculata ITS                | 233    |
| Glaucozystis ITS              | Reverse   | TCGCTGCGTTCTTCATCGT  |                               |        |
| ITS1-FWD                      | Forward   | TCCGTAGGTGAACCTGCGG  | P. lima ITS                   | 403    |
| P. lima ITS                   | Reverse   | TCAAGGGCCACAGCAAGAC  |                               |        |
| Diktys durna-like virus 1     | Forward   | ACCGCATCTTCGCAACAGA  | Diktys durna-like virus 1     | 664    |
| Diktys durna-like virus 1     | Reverse   | AGCTTTGCATGCGGGTAGT  |                               |        |
| G_carpenteri LSU              | Forward   | AGGCTGTGCATGGCTCATT  | G. carpenteri LSU             | 641    |
| G_carpenteri LSU              | Reverse   | CAGCCATCCCCAGCAGAAA  |                               |        |
| Orion durna-like virus 1      | Forward   | GCTCGGCTTCAGGTCAGTT  | Orion durna-like virus 1      | 654    |
| Orion durna-like virus 1      | Reverse   | CACTTGCCTTTTCGGTGGG  |                               |        |
| Althepos endorna-like virus 1 | Forward   | AGTGGCGCACAAAGCACTAT | Althepos endorna-like virus 1 | 877    |
| Althepos endorna-like virus 1 | Reverse   | CCCCATTTCCAAGCCGTCT  |                               |        |
| Almopos endorna-like virus 1  | Forward   | ACCTTCTTGGCCTGGATGC  | Almopos endorna-like virus 1  | 623    |
| Almopos endorna-like virus 1  | Reverse   | ATCCTCCTCAGACGGTGCT  |                               |        |
| Rhodella_maculata ITS1        | Forward   | CGGCCGAGTTCGACTATCC  | R. maculata ITS1              | 759    |
| Rhodella_maculata ITS1        | Reverse   | TTCTTTGGGGTAGGCGCTG  |                               |        |
| Phineus pisuviri-like virus 1 | Forward   | TCGGTCCAGATGGCAAACC  | Phineus pisuviri-like virus 1 | 833    |
| Phineus pisuviri-like virus 1 | Reverse   | CACCGGTGAGCCTTGTGAT  |                               |        |

## Supplementary Figures

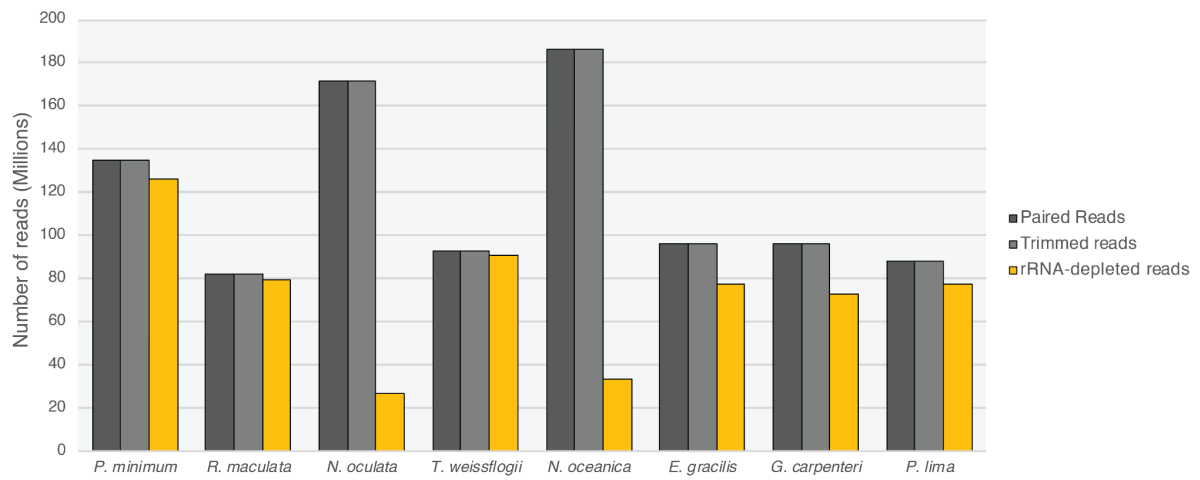

**Figure A1. Number of sequencing reads obtained for each algae library.** Paired-end reads obtained using the Illumina NovaSeq platform are indicated in dark grey. The final number of paired reads obtained after trimming and rRNA depletion steps are indicated in light grey and yellow, respectively.

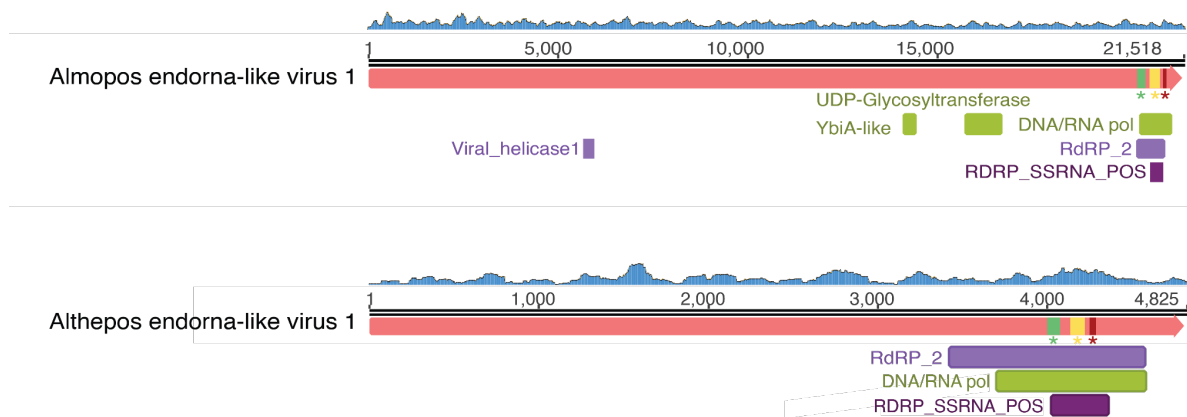

**Figure A2. Genome organisation of the Endorna-like viruses identified in this study.**

Read coverage of each genome is represented as a blue histogram. ORFs were predicted using standard genetic codes and their directions represented as arrows. ORFs encoding RdRp-like signals and hypothetical functions are indicated in red and grey respectively. Light purple, green and dark purple boxes indicate PROSITE, SUPERFAMILY and PFAM predicted domains, respectively. A, B and C RdRp motifs are indicated in green, yellow and red boxes, respectively.

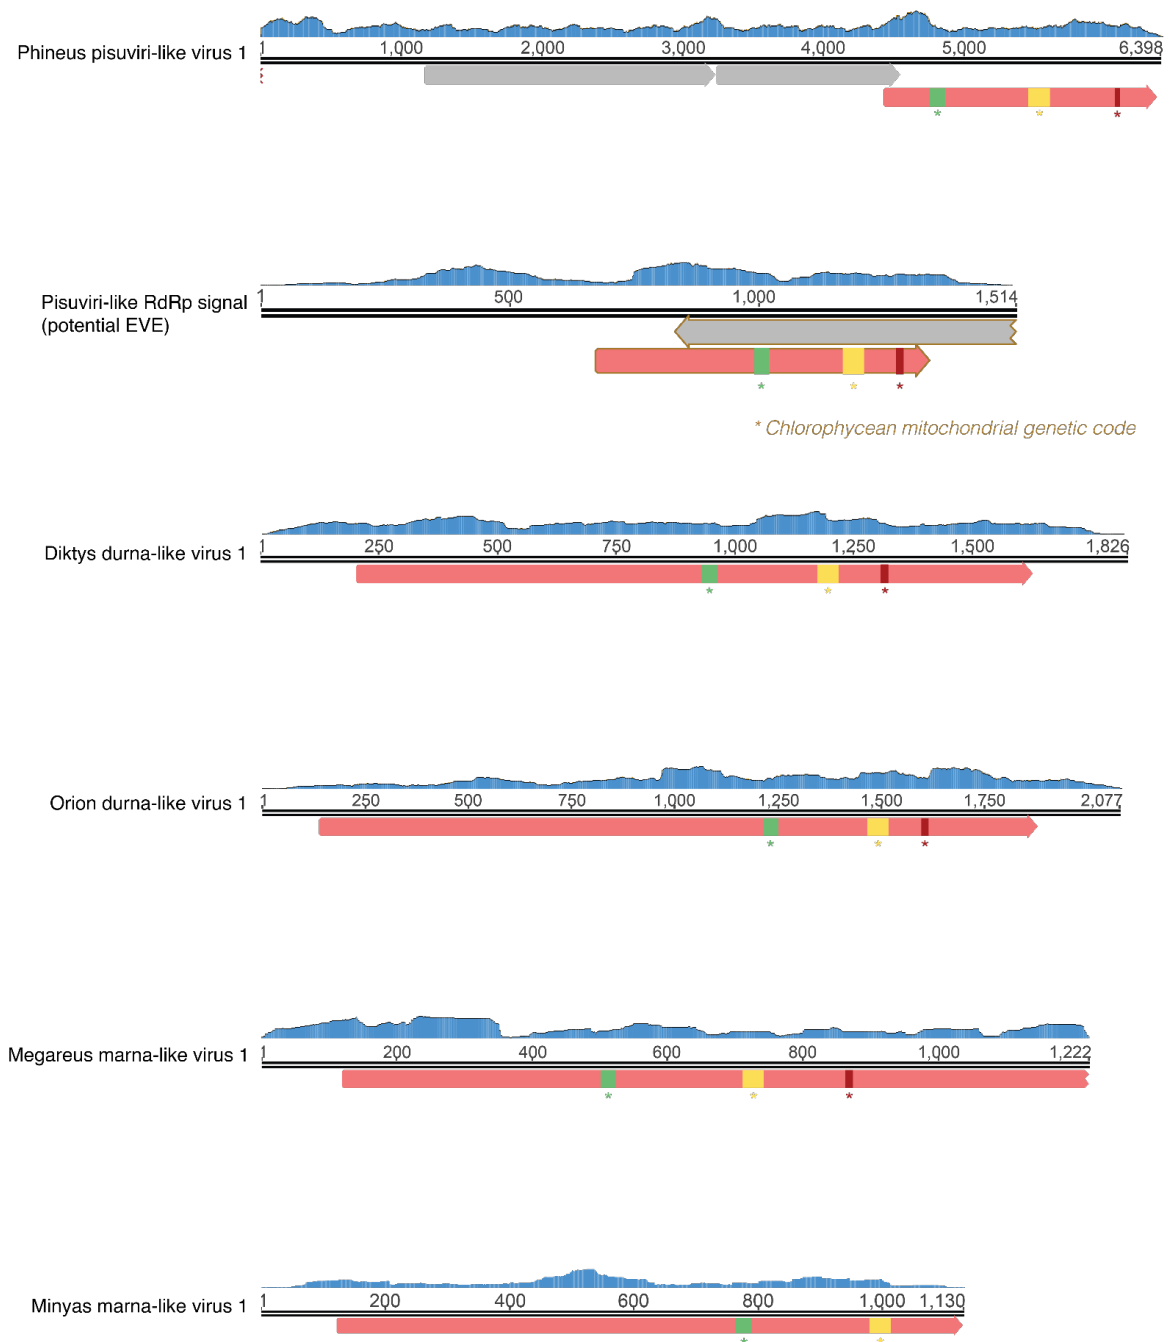

**Figure A3. Genome organisation of the Pisuviricota-like viral signals identified in this study.** Read coverage of each genome is represented as a blue histogram. ORFs were predicted using either standard genetic codes or the Chlorophycean mitochondrial code, and their directions represented as arrows. ORFs encoding RdRp-like signals and hypothetical functions are indicated in red and grey, respectively. A, B and C RdRp motifs are indicated in green, yellow and red boxes, respectively.
